# Supplementary material
Source: MDPI journal article supplement (https://www.mdpi.com/search?q=fibers-11-00050)
Supplement: s001 [file fibers-11-00050-s001.zip]

Archive with 1 entries (1 files):
- fibers-2398093-supplementary.pdf
